# Supplementary material for: Loss associated with subtractive health service change: The case of specialist cancer centralization in England
Source: PubMed Central journal article supplement (PMC9548928; doi:10.1177/13558196221082585), 2022-04-26
Supplement: sj-pdf-1-hsr-10.1177_13558196221082585.pdf [file sj-pdf-1-hsr-10.1177_13558196221082585.pdf]

## Online Supplement 1

**Table S1.** Changes to local and specialist surgical sites during the centralisation

|                          | <b>Sites that never provided specialist surgical activity (local)</b> | <b>Sites that lost specialist surgical activity (local)</b> | <b>Sites that were selected as specialist centres (specialist)</b> |
|--------------------------|-----------------------------------------------------------------------|-------------------------------------------------------------|--------------------------------------------------------------------|
| <b>Prostate/bladder</b>  | 8                                                                     | 3                                                           | 1                                                                  |
| <b>Renal</b>             | 2                                                                     | 8                                                           | 1                                                                  |
| <b>Oesophago-gastric</b> | 9                                                                     | 1                                                           | 1+1 <sup>a</sup>                                                   |

<sup>a</sup>A single site was recommended for specialist OG surgery; however, a further site continued to provide OG surgery with the expectation that it would be consolidated over time. This has not yet happened at the time of publication.

**Table S2.** Standards and resources expected of a local and specialist centre (populated through discussions with clinical collaborators)

|                                           | Local units                                                                                                                                                                                                                                                                                                                                                                                   | Specialist centres                                                                                                                                                                                                                                                                                                                                                                                                                                                            |
|-------------------------------------------|-----------------------------------------------------------------------------------------------------------------------------------------------------------------------------------------------------------------------------------------------------------------------------------------------------------------------------------------------------------------------------------------------|-------------------------------------------------------------------------------------------------------------------------------------------------------------------------------------------------------------------------------------------------------------------------------------------------------------------------------------------------------------------------------------------------------------------------------------------------------------------------------|
| <b>Leadership</b>                         |                                                                                                                                                                                                                                                                                                                                                                                               | Named leader who takes responsibility for system-wide collaborative working, and manages relationship to local units.                                                                                                                                                                                                                                                                                                                                                         |
| <b>Multidisciplinary team composition</b> | Local MDT <sup>a</sup> with membership as per peer review measures, e.g.: <ul style="list-style-type: none"> <li>• Clinical nurse specialist</li> <li>• Surgeon</li> <li>• Oncologist</li> <li>• Palliative care representative</li> <li>• MDT coordinator</li> <li>• Radiologist</li> <li>• Histopathologist</li> <li>• Relevant disciplines e.g. dietician, clinical psychology.</li> </ul> | Specialist MDT with additional members to local MDT including: <ul style="list-style-type: none"> <li>• Specialist surgeons</li> <li>• Specialist oncologists</li> <li>• Other specialists e.g. Specialist Allied Health Professionals, interventional radiologists providing advanced tumour staging techniques and non-surgical treatment options</li> <li>• Clinical trials nurses</li> </ul>                                                                              |
| <b>Diagnostics available</b>              | <ul style="list-style-type: none"> <li>• Computed tomography</li> <li>• Magnetic resonance imaging</li> <li>• Ultrasound</li> </ul>                                                                                                                                                                                                                                                           | <ul style="list-style-type: none"> <li>• Nuclear medicine</li> <li>• Positron emission tomography techniques</li> <li>• Image-guided biopsy techniques</li> </ul>                                                                                                                                                                                                                                                                                                             |
| <b>Treatment options available</b>        | <ul style="list-style-type: none"> <li>• Radiotherapy (where available)</li> <li>• Chemotherapy (if provided)</li> <li>• Cancer-specific therapies e.g. palliative endoscopy</li> <li>• Benign surgery</li> <li>• Follow-up care</li> </ul>                                                                                                                                                   | <ul style="list-style-type: none"> <li>• Radiotherapy</li> <li>• Chemotherapy</li> <li>• Cancer-specific therapies e.g. palliative endoscopy, hormone therapy, non-surgical tumour ablation (e.g. cryotherapy, radiofrequency ablation, HIFU etc)</li> <li>• Full spectrum of surgical procedures including minimally invasive surgical techniques and complex benign cases</li> <li>• Full spectrum of intervention radiology including ablation and embolisation</li> </ul> |
| <b>Specialist workforce</b>               | <ul style="list-style-type: none"> <li>• Dedicated oncology clinical nurse specialist</li> <li>• Chemotherapy pharmacist</li> </ul>                                                                                                                                                                                                                                                           | <ul style="list-style-type: none"> <li>• Specialist anaesthetists</li> <li>• Surgical outreach from the centre for post op follow up</li> </ul>                                                                                                                                                                                                                                                                                                                               |
| <b>Education and training</b>             | <ul style="list-style-type: none"> <li>• Training for all professional members in specialist content</li> </ul>                                                                                                                                                                                                                                                                               | <ul style="list-style-type: none"> <li>• Training for all professional members in specialist content</li> <li>• Offers simulation training in new surgical techniques</li> <li>• Conducts training in delivery of systemic therapy</li> </ul>                                                                                                                                                                                                                                 |
| <b>Trials and research</b>                | <ul style="list-style-type: none"> <li>• Carry out prospective audit of service and publish transparent outcomes data</li> <li>• Participation in network audit programme and National Audits</li> <li>• Access to clinical trials and research nursing</li> </ul>                                                                                                                            | <ul style="list-style-type: none"> <li>• Take full part in all relevant clinical trials</li> <li>• Ensure all patients asked at first appointment if they would consider being entered into a clinical trial.</li> <li>• Entry into trials offered at first decision to treat appointment – after histology and CT is available</li> <li>• Carry out prospective audit of service and publish transparent outcomes data</li> <li>• Tissue biobanking</li> </ul>               |

<sup>a</sup>MDT = multidisciplinary team
